# Supplementary material
Source: MDPI journal article supplement (https://www.mdpi.com/1996-1073/14/1/189)
Supplement: s1 [file s1]

## Supplementary Materials

# Thermodynamic Analysis of Biomass Gasification Using Aspen Plus: Comparison of Stoichiometric and Non-Stoichiometric Models

María Pilar González-Vázquez <sup>1</sup>, Fernando Rubiera <sup>1</sup>, Covadonga Pevida <sup>1,\*</sup>, Daniel T. Pio <sup>2</sup> and Luís A.C. Tarelho <sup>2</sup>

<sup>1</sup> Instituto de Ciencia y Tecnología del Carbono, INCAR-CSIC, Francisco Pintado Fe 26, 33011 Oviedo, Spain; mariapilar.gonzalez@incar.csic.es (M.P.G.-V.); frubiera@incar.csic.es (F.R.)

<sup>2</sup> Department of Environment and Planning & Centre for Environmental and Marine Studies (CESAM), Campus Universitario de Santiago, University of Aveiro, 3810-193 Aveiro, Portugal; danieltp@ua.pt (D.T.P.); ltarelho@ua.pt (L.A.C.T.)

\* Correspondence: cpevida@incar.csic.es

**Citation:** M.P. González-Vázquez, F. Rubiera, C. Pevida, D.T. Pio, L.A.C. Tarelho. Thermodynamic Analysis of Biomass Gasification Using Aspen Plus: Comparison of Stoichiometric and Non-Stoichiometric Models. *Energies* **2021**, *14*, 189. <https://doi.org/10.3390/en14010189>

Received: 27 November 2020

Accepted: 28 December 2020

Published: 1 January 2021

**Publisher's Note:** MDPI stays neutral with regard to jurisdictional claims in published maps and institutional affiliations.

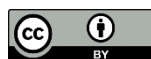

**Copyright:** © 2021 by the authors. Submitted for possible open access publication under the terms and conditions of the Creative Commons Attribution (CC BY) license (<http://creativecommons.org/licenses/by/4.0/>).

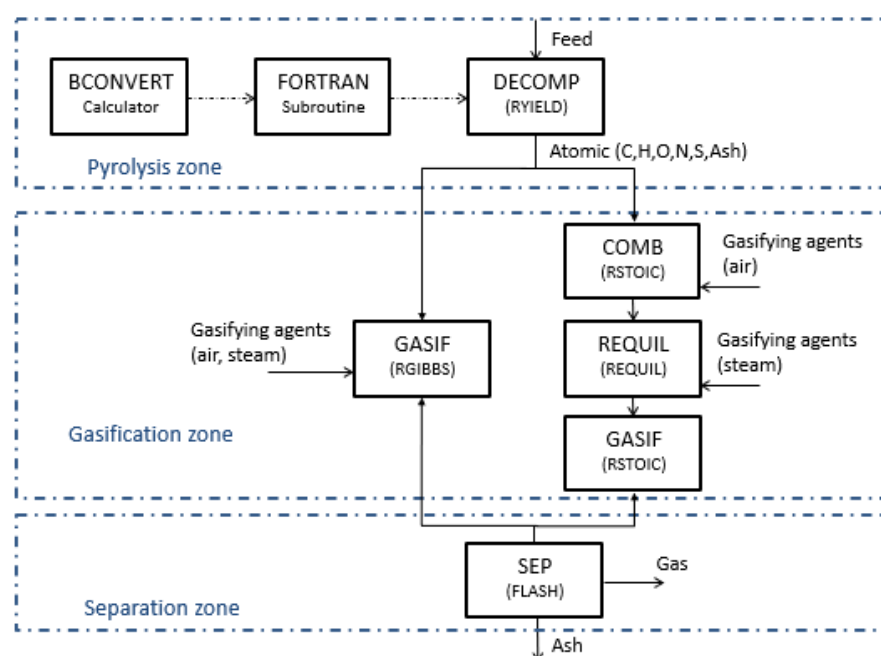

**Figure S1.** Flow chart of the simulation procedure for the steam gasification process.

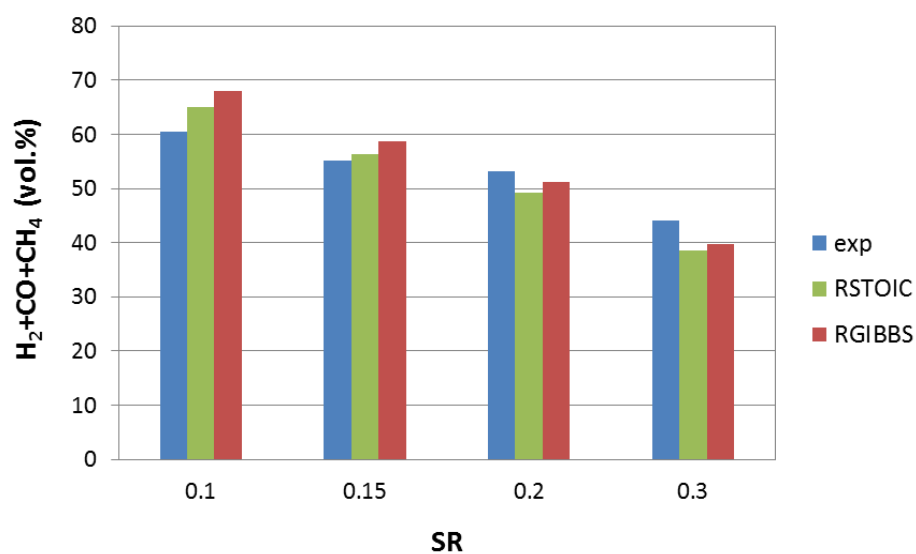

**Figure S2.** Comparison between experiment and simulation data of combustible gas concentration at different stoichiometric ratios, for the gasification of PKS with 70 vol.% steam at 900 °C.

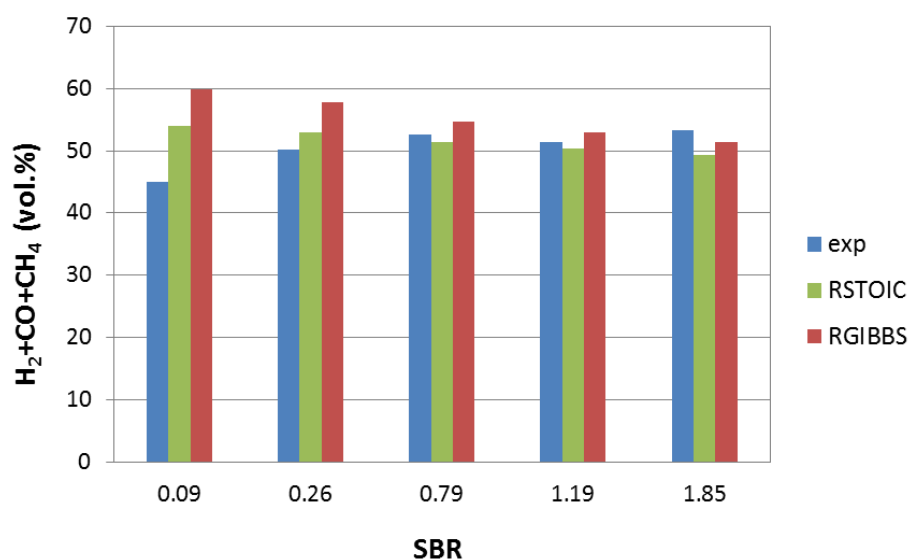

**Figure S3.** Comparison between experiment and simulation data of combustible gas concentration at different steam to biomass ratios, for the gasification of PKS at 900 °C with SR = 0.2.

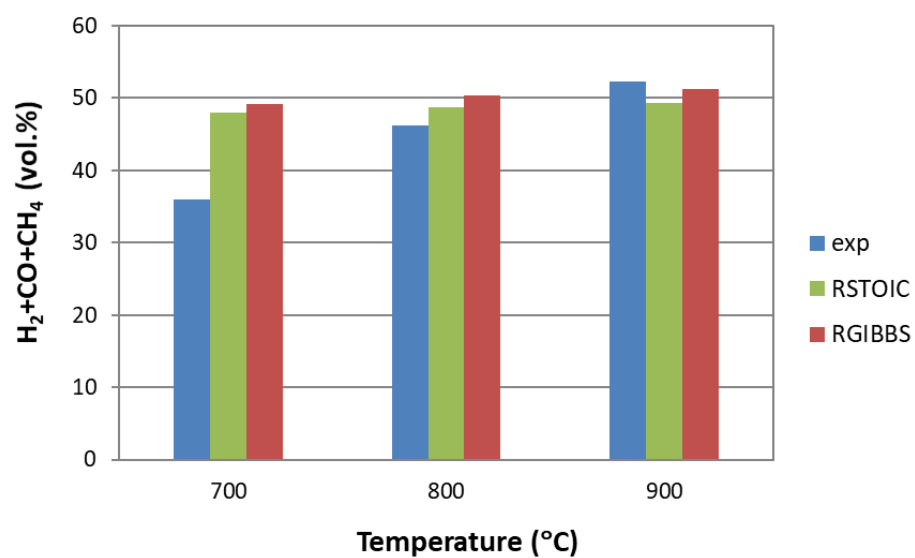

**Figure S4.** Comparison between experiment and simulation data of combustible gas concentration at different temperatures, for the gasification of PKS at SR = 0.2 and 70 vol.% steam.

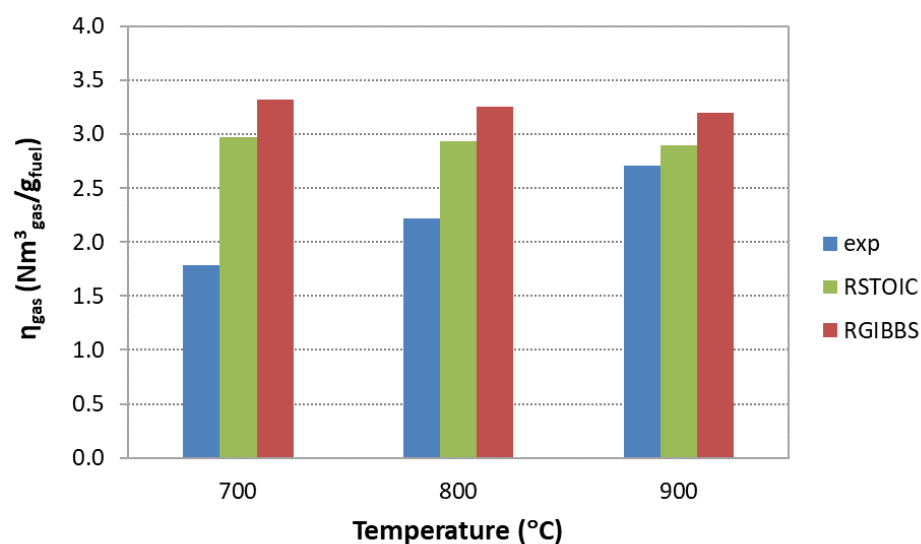

**Figure S5.** Effect of the variation of  $\eta_{\text{gas}}$  with temperature for the gasification of PKS with SR = 0.2 and 70 vol.% steam.

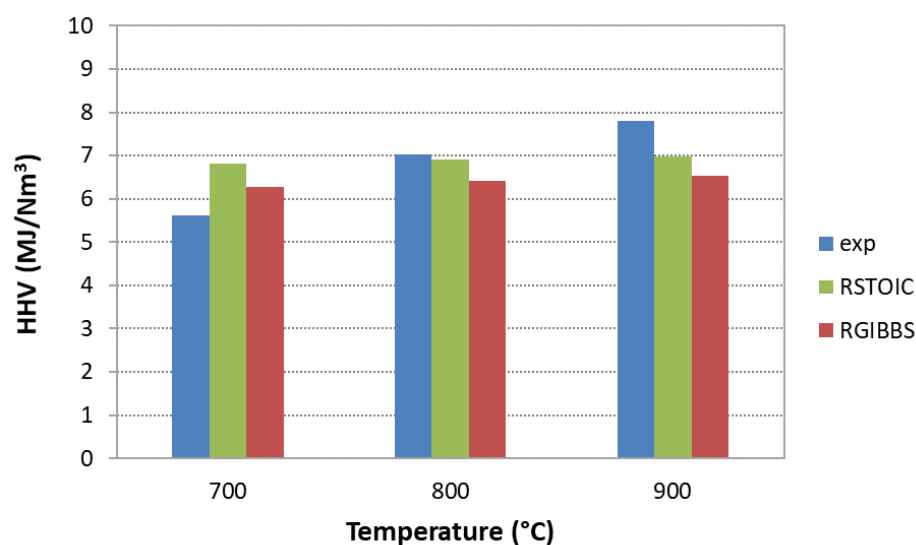

Figure S6. Effect of the variation of HHV with temperature for the gasification of PKS with SR = 0.2 and 70 vol.% steam.

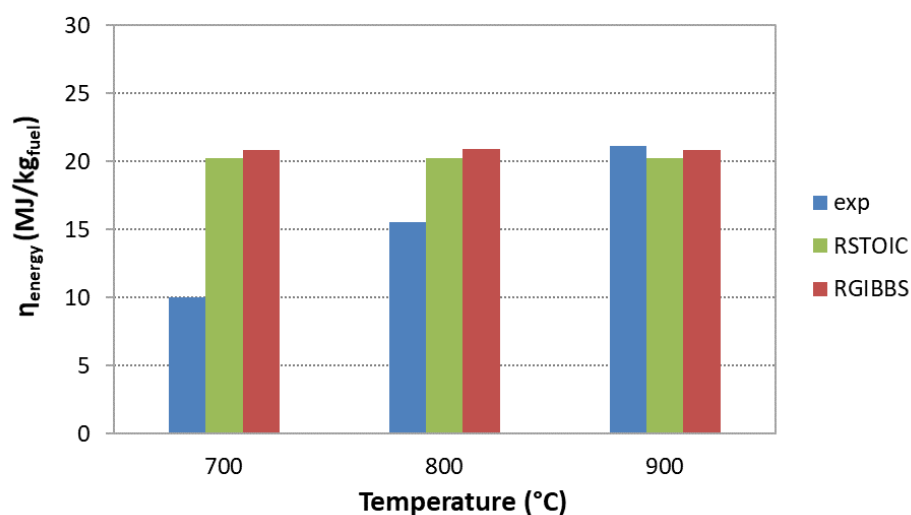

Figure S7. Effect of the variation of temperature on  $\eta_{\text{energy}}$  for the gasification of PKS with SR = 0.2 and 70 vol.% steam.

Table S1. Block description used in the simulation model.

| Block name        | Aspen Plus® name | Description                                                                                                                                                                                                                                    |
|-------------------|------------------|------------------------------------------------------------------------------------------------------------------------------------------------------------------------------------------------------------------------------------------------|
| DECOMP            | RYIELD           | Models a reactor by specifying reaction yields of each component. Converts the non-conventional stream "FEED" into its conventional components. Ultimate and proximate analysis of biomass are required.                                       |
| BCONVRT           | CALCULATOR       | Fortran subroutine used to calculate the yields of the component attributes of the biomass feedstock. A set of different variables associated to inlet/outlet streams is required to solve this block.                                         |
| HEAT-1/<br>HEAT-2 | EXCHANGER        | Increase the oxidizing agent temperature from ambient temperature to the gas preheater. This temperature is fixed in 650 °C.                                                                                                                   |
| GASIF             | RGIBBS           | Gibbs free energy reactor. Simulates the partial oxidation and gasification reactions. Chemical equilibrium is restricted by specifying a temperature approach for each reaction. The operation temperature is a variable studied in the work. |

|        |        |                                                                                                                                                                                                                                                               |
|--------|--------|---------------------------------------------------------------------------------------------------------------------------------------------------------------------------------------------------------------------------------------------------------------|
| SEP    | FLASH  | Separates the gas production in the gasification and the solid waste remaining in the process.                                                                                                                                                                |
| COMB   | RSTOIC | Simulates the oxidation reactions occur in a gasification process when conventional components of biomass react with O <sub>2</sub> from the air stream inlet. Stoichiometric reaction is known. The operation temperature is a variable studied in the work. |
| GASIF  |        | Simulates the char gasification when carbonaceous material reacts with gasifying agent not consumed in the previous steps. Stoichiometric reaction is known. The operation temperature is a variable studied in the work.                                     |
| REQUIL | REQUIL | Simulates the equilibrium of homogeneous reactions when steam is used as gasifying agent. The operation temperature is a variable studied in the work.                                                                                                        |
| MIX2   | MIXER  | Mixes the stream S1 and S with specifying temperature and pressure variables.                                                                                                                                                                                 |

**Table S2.** Comparison of experimental and model predictions and error values for the product gas compositions (vol.%) at different stoichiometric ratios during gasification of PKS using 70 vol.% steam at 900 °C.

| SR   | EXPERIMENTAL    |       |                 |                | GIBBS           |       |                 |                | RMS   | RSTOIC          |       |                 |                | RMS  |
|------|-----------------|-------|-----------------|----------------|-----------------|-------|-----------------|----------------|-------|-----------------|-------|-----------------|----------------|------|
|      | CO <sub>2</sub> | CO    | CH <sub>4</sub> | H <sub>2</sub> | CO <sub>2</sub> | CO    | CH <sub>4</sub> | H <sub>2</sub> |       | CO <sub>2</sub> | CO    | CH <sub>4</sub> | H <sub>2</sub> |      |
| 0.1  | 15.83           | 26.05 | 7.33            | 27.10          | 12.37           | 23.25 | 2.76E-03        | 44.76          | 9.82  | 12.60           | 24.21 | 4.88            | 35.88          | 5.09 |
| 0.15 | 17.02           | 24.43 | 6.53            | 24.13          | 15.60           | 17.18 | 7.83E-04        | 41.52          | 10.00 | 14.67           | 19.26 | 3.65            | 33.42          | 4.59 |
| 0.2  | 15.63           | 22.64 | 5.95            | 24.68          | 17.54           | 13.16 | 2.75E-04        | 38.15          | 8.81  | 16.24           | 15.38 | 2.65            | 31.29          | 3.89 |
| 0.3  | 17.00           | 17.71 | 4.61            | 21.74          | 19.50           | 8.18  | 4.54E-05        | 31.49          | 7.31  | 18.49           | 9.61  | 1.10            | 27.84          | 2.10 |

**Table S3.** Comparison of experimental and model predictions and error values for the product gas compositions (vol.%) at different steam to biomass ratios during gasification of PKS at 900 °C with SR=0.2.

| SBR  | EXPERIMENTAL    |        |                 |                | GIBBS           |       |                 |                | RMS   | RSTOIC          |       |                 |                | RMS  |
|------|-----------------|--------|-----------------|----------------|-----------------|-------|-----------------|----------------|-------|-----------------|-------|-----------------|----------------|------|
|      | CO <sub>2</sub> | CO     | CH <sub>4</sub> | H <sub>2</sub> | CO <sub>2</sub> | CO    | CH <sub>4</sub> | H <sub>2</sub> |       | CO <sub>2</sub> | CO    | CH <sub>4</sub> | H <sub>2</sub> |      |
| 0.09 | 16.90           | 21.947 | 5.83            | 17.22          | 4.62            | 31.14 | 8.63E-03        | 28.71          | 10.01 | 6.18            | 29.64 | 4.40            | 19.99          | 6.78 |
| 0.26 | 15.81           | 24.23  | 6.71            | 19.18          | 7.46            | 27.15 | 4.17E-03        | 30.69          | 8.00  | 8.96            | 25.65 | 3.63            | 23.75          | 4.45 |
| 0.79 | 15.53           | 23.66  | 5.93            | 23.09          | 12.54           | 19.98 | 1.26E-03        | 34.68          | 6.93  | 13.09           | 19.65 | 2.81            | 28.87          | 4.04 |
| 1.19 | 16.91           | 21.30  | 5.77            | 24.38          | 15.00           | 16.68 | 6.45E-04        | 36.27          | 7.07  | 14.67           | 17.58 | 2.70            | 30.02          | 3.88 |
| 1.85 | 15.63           | 22.64  | 5.95            | 24.68          | 17.54           | 13.16 | 2.75E-04        | 38.15          | 8.81  | 16.24           | 15.38 | 2.65            | 31.29          | 5.19 |

**Table S4.** Comparison of experimental and model predictions and error values for the product gas compositions (vol.%) at different temperatures during gasification of PKS using 70 vol.% steam with SR=0.2.

| T(°C) | EXPERIMENTAL    |        |                 |                | GIBBS           |       |                 |                | RMS   | RSTOIC          |       |                 |                | RMS   |
|-------|-----------------|--------|-----------------|----------------|-----------------|-------|-----------------|----------------|-------|-----------------|-------|-----------------|----------------|-------|
|       | CO <sub>2</sub> | CO     | CH <sub>4</sub> | H <sub>2</sub> | CO <sub>2</sub> | CO    | CH <sub>4</sub> | H <sub>2</sub> |       | CO <sub>2</sub> | CO    | CH <sub>4</sub> | H <sub>2</sub> |       |
| 700   | 16.67           | 19.081 | 5.38            | 11.57          | 20.66           | 8.83  | 3.08E-02        | 40.39          | 15.65 | 18.31           | 12.50 | 2.59            | 32.97          | 11.31 |
| 800   | 15.73           | 22.60  | 6.16            | 17.48          | 19.00           | 11.13 | 2.40E-03        | 39.22          | 12.78 | 17.23           | 14.00 | 2.62            | 32.10          | 8.70  |
| 900   | 15.60           | 22.59  | 5.94            | 23.77          | 17.54           | 13.16 | 2.75E-04        | 38.15          | 9.15  | 16.24           | 15.38 | 2.65            | 31.29          | 5.47  |
